# Supplementary material for: LiF-assisted crystallization of zinc 4-carboxyphenylphosphonates with pillared layered structures
Source: Royal Society of Chemistry journal article supplement (doi:10.1039/b901332f), 2009-01-01
Supplement: b901332f.pdf [file b901332f.pdf]

## Supporting information

### LiF-assisted crystallization of zinc 4-carboxyphenylphosphonates with pillared layered structures

Jin-Tang Li, Li-Rong Guo, Yang Shen, Li-Min Zheng\*

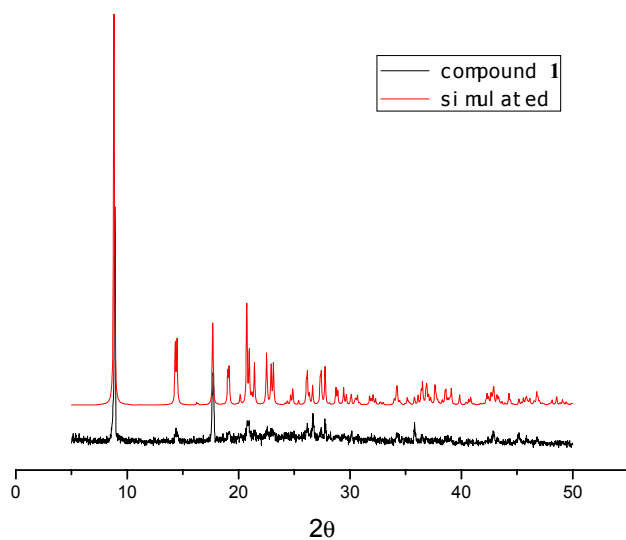

Figure S1 XRD patterns for compound 1

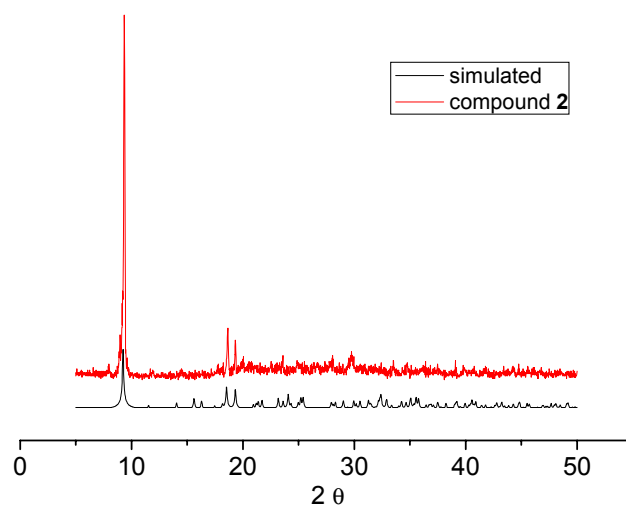

Figure S2 XRD patterns for compound 2

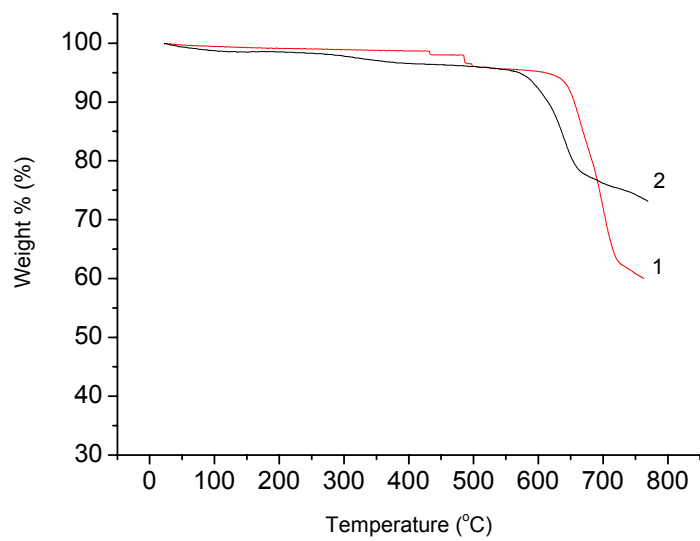

**Figure S3** Thermal analyses for compounds **1** and **2**
